# Supplementary material for: Ultra-sensitive Sb speciation analysis in water samples by magnetic ionic liquid dispersive liquid–liquid microextraction and multivariate optimization
Source: Royal Society of Chemistry journal article supplement (doi:10.1039/d0ay02276d), 2021-01-01
Supplement: d0ay02276d1.pdf [file d0ay02276d1.pdf]

**Supplementary information**

**Ultra-sensitive Sb speciation analysis in water samples by magnetic ionic liquid  
dispersive liquid-liquid microextraction and multivariate optimization**

**María N. Oviedo, Emiliano F. Fiorentini, Aldana A. Lemos, Rodolfo G. Wuilloud\***

*Laboratorio de Química Analítica para Investigación y Desarrollo (QUIANID), Facultad de Ciencias Exactas y Naturales, Universidad Nacional de Cuyo / Instituto Interdisciplinario de Ciencias Básicas (ICB), CONICET UNCUYO, Padre J. Contreras 1300, (5500) Mendoza, Argentina.*

\*Corresponding author. Tel: +54-261-4259738

E-mail address: [rwuilloud@mendoza-conicet.gob.ar](mailto:rwuilloud@mendoza-conicet.gob.ar); [rodolfowuilloud@gmail.com](mailto:rodolfowuilloud@gmail.com) (R.G. Wuilloud)

Figure S1

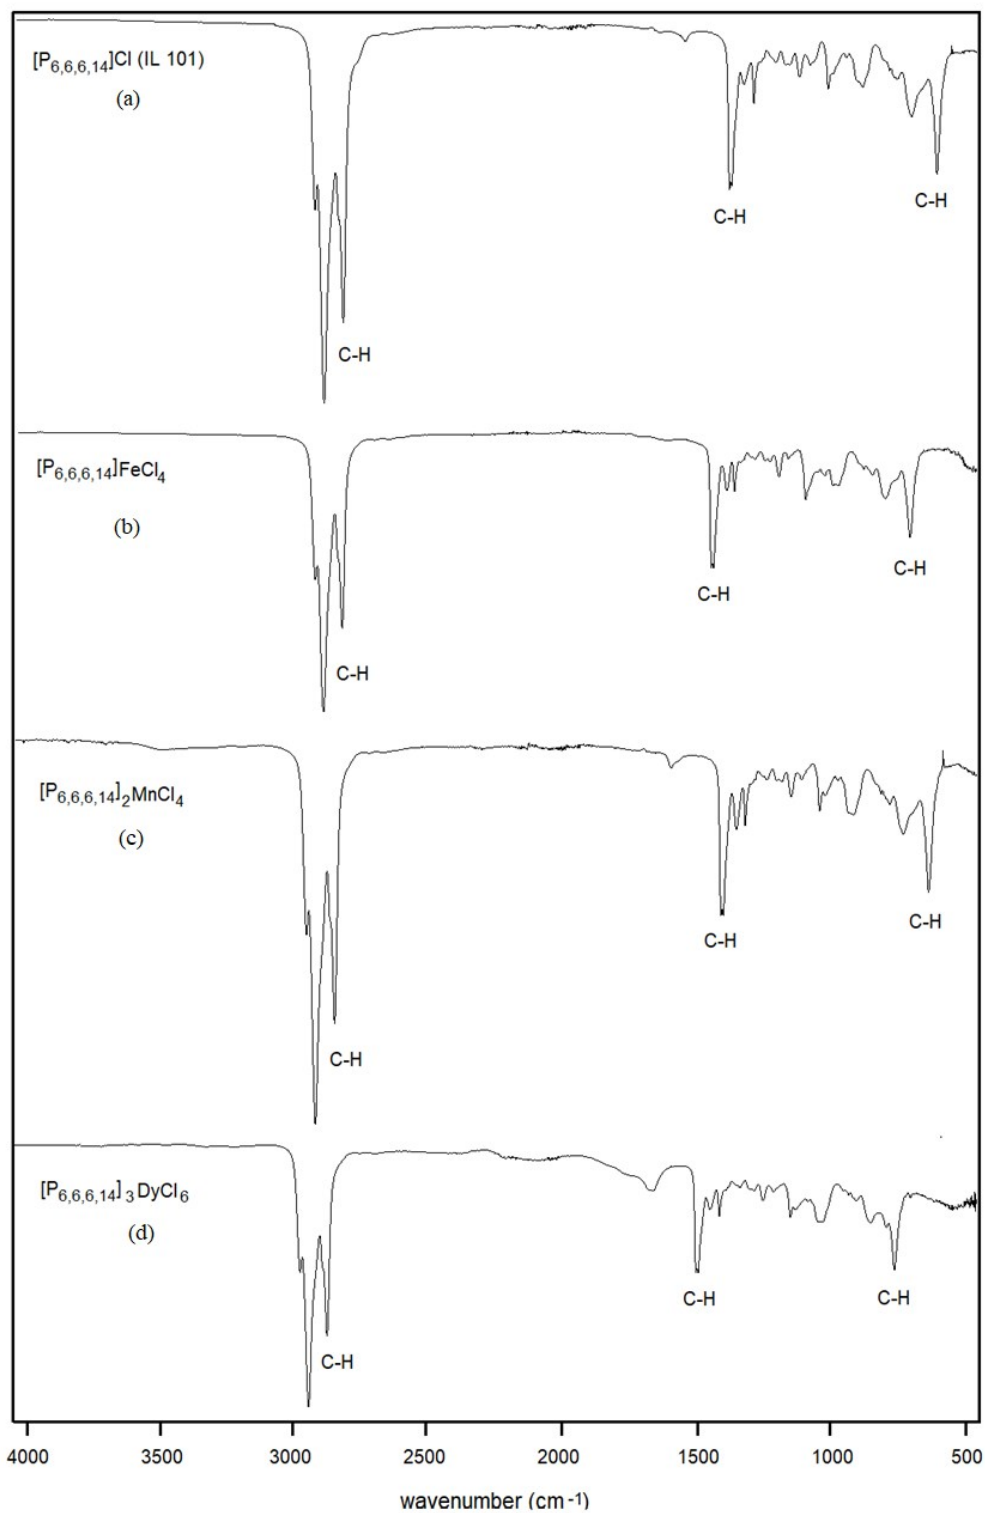

Fig. S1. FTIR spectra of (a)  $[P_{6,6,6,14}]Cl$  and MILs studied in this work. (b)  $[P_{6,6,6,14}]FeCl_4$ , (c)  $[P_{6,6,6,14}]_2MnCl_4$ . (d)  $[P_{6,6,6,14}]_3DyCl_6$ .

Figure S2

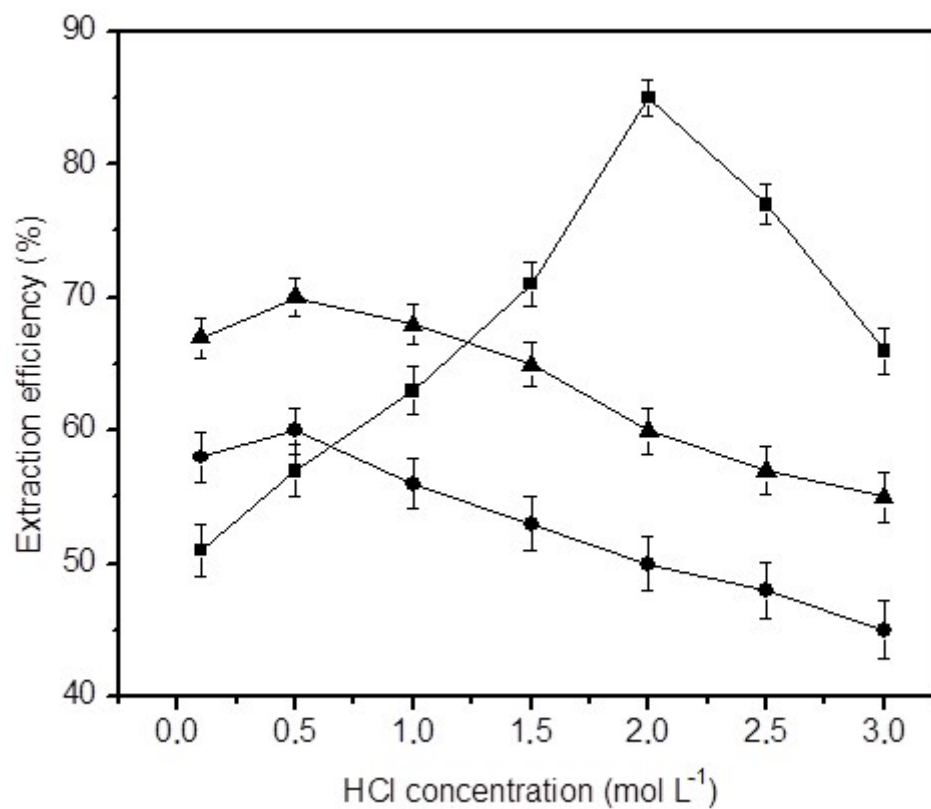

**Fig. S2.** Effect of hydrochloric acid concentration on Sb(III) extraction efficiency using [P<sub>6,6,6,14</sub>]FeCl<sub>4</sub> (■), [P<sub>6,6,6,14</sub>]<sub>3</sub>DyCl<sub>6</sub> (▲) and [P<sub>6,6,6,14</sub>]<sub>2</sub>MnCl<sub>4</sub> (●) as extraction solvents. Other conditions were as mentioned in Table 1 (95% confidence interval, n = 6).

Figure S3

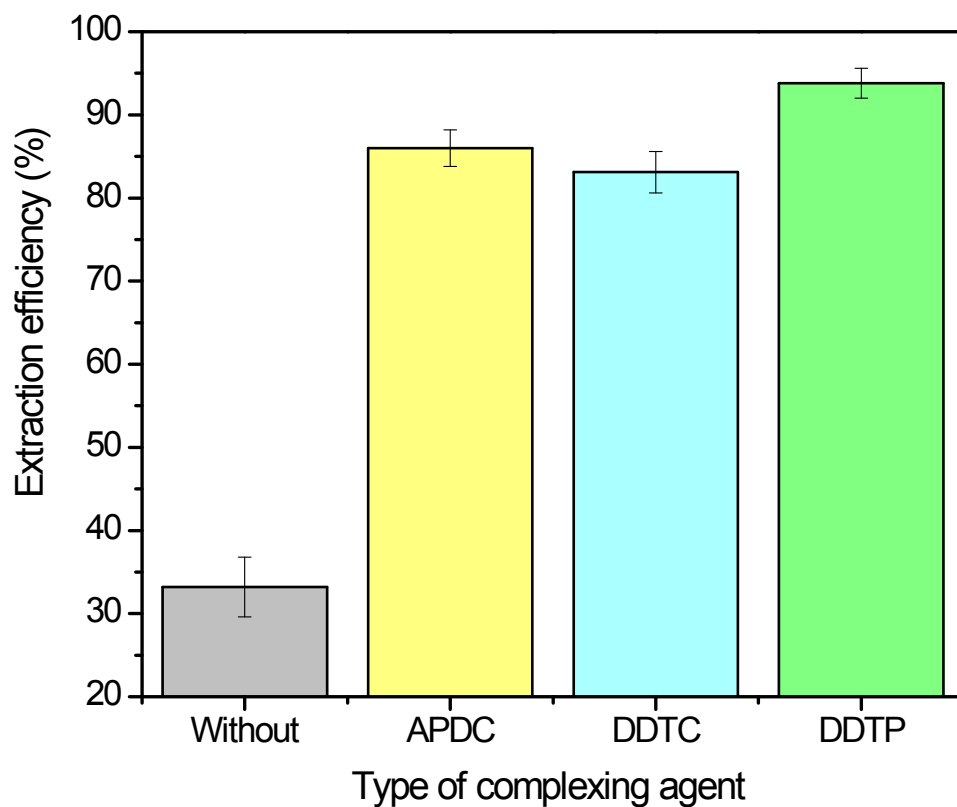

**Fig. S3.** Effect of different complexing agents on Sb(III) extraction efficiency (6 mL of sample at 2 mol L<sup>-1</sup> HCl). ■ Without, ■ APDC, ■ DDTC and ■ DDTP. Other conditions were as indicated in Table 1 (95% confidence interval, n = 6).

**Figure S4**

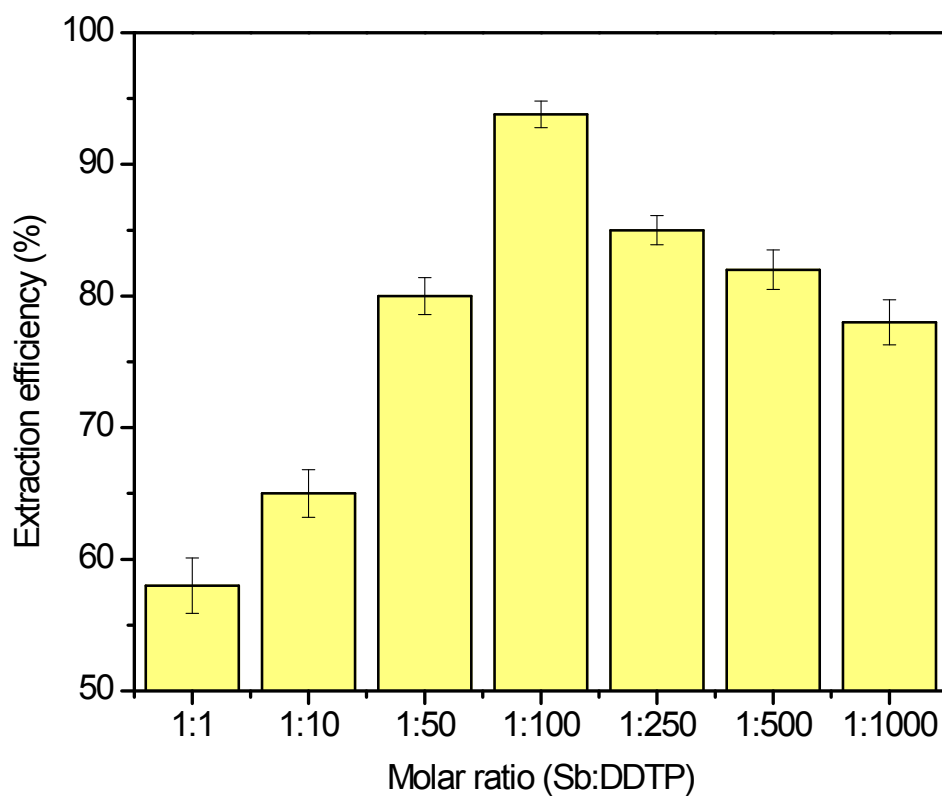

**Fig. S4.** Influence of Sb:DDTP molar ratio on Sb(III) extraction efficiency using  $[P_{6,6,6,14}]FeCl_4$  as extracting phase. Other conditions were as mentioned in Table 1 (95% confidence interval,  $n = 6$ ).

Figure S5

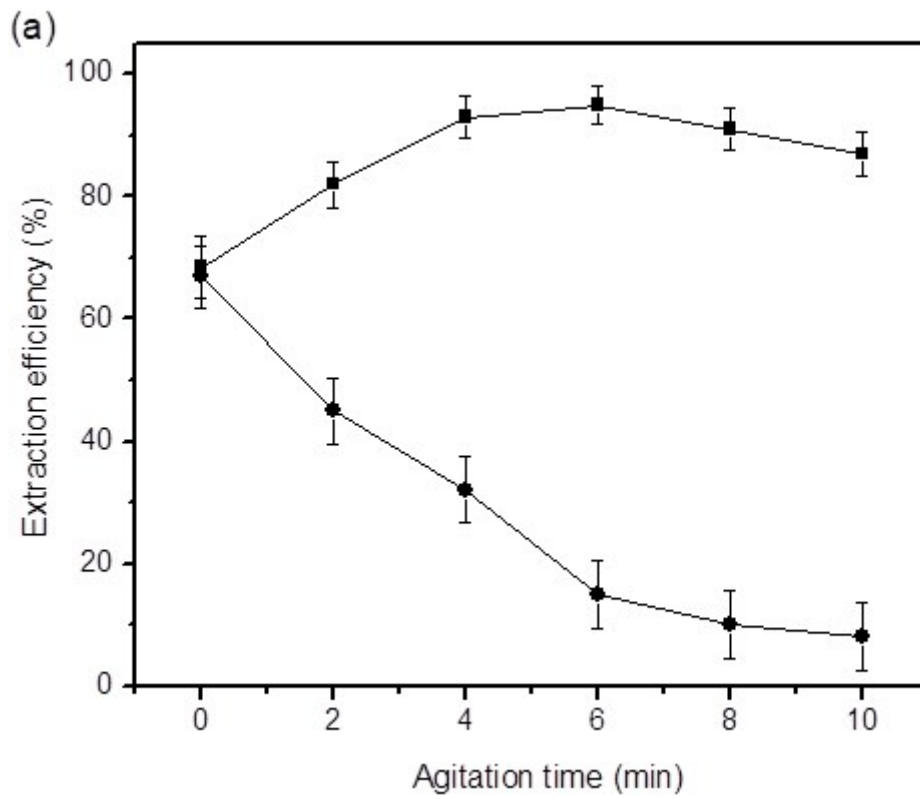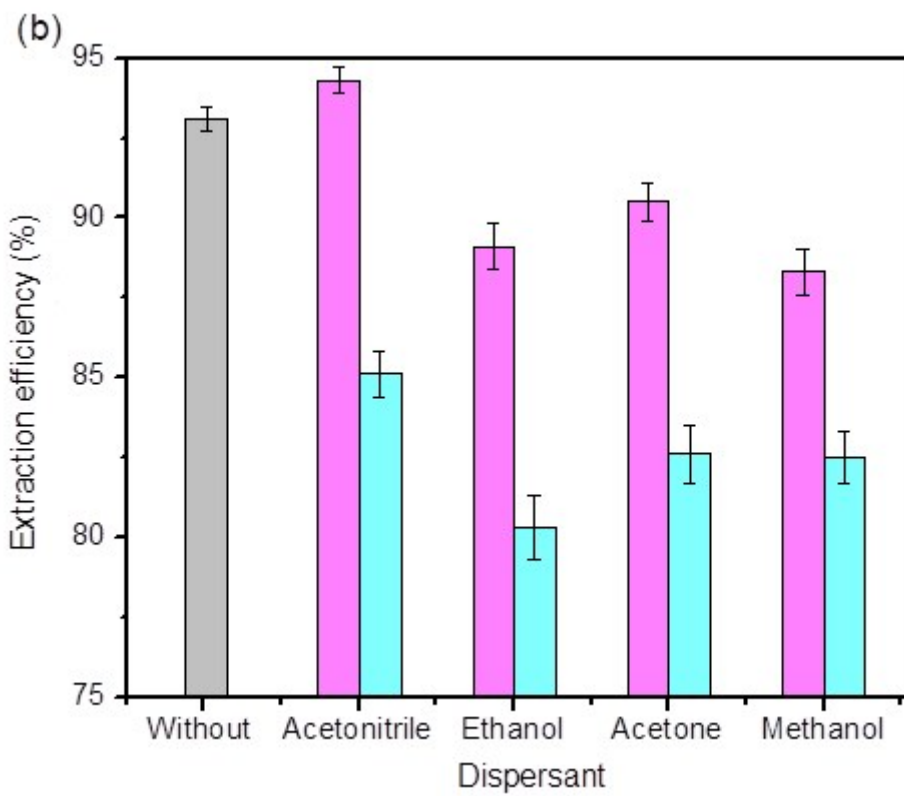

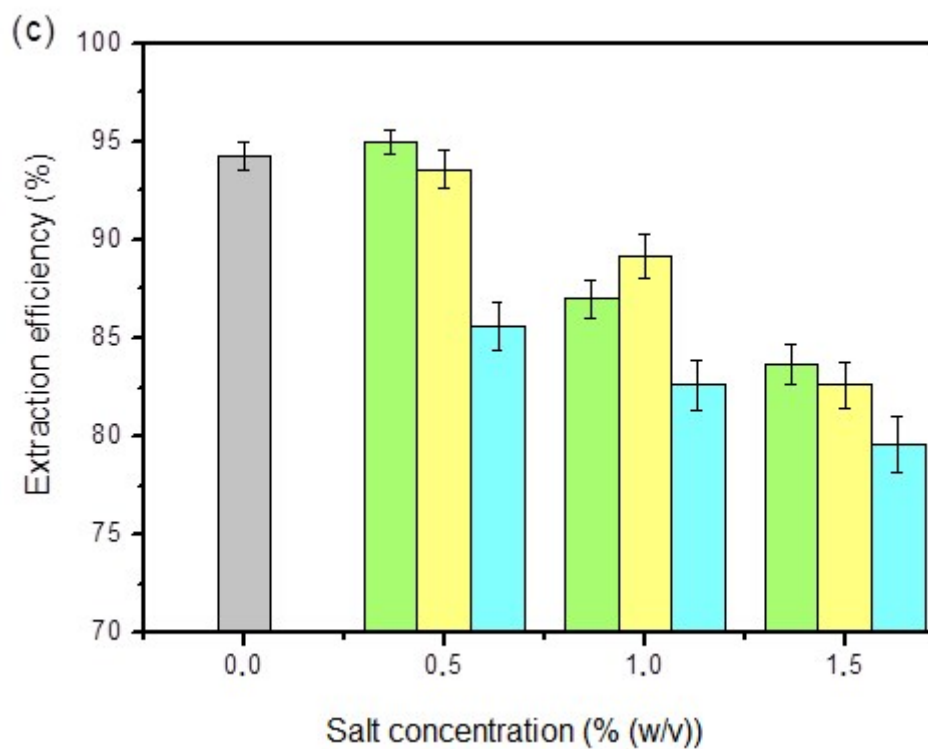

**Fig. S5.** Study of the categorical factors involved in the proposed method. (a) Type of agitation: (■) vortex and (●) ultrasound. (b) Dispersants volume: ■ 25  $\mu$ L and ■ 50  $\mu$ L. (c) Ionic strength: ■ NaCl, ■ NaNO<sub>3</sub> and ■ NaClO<sub>4</sub>. Other conditions are shown in Table 1 (95% confidence interval, n = 6).

**Figure S6**

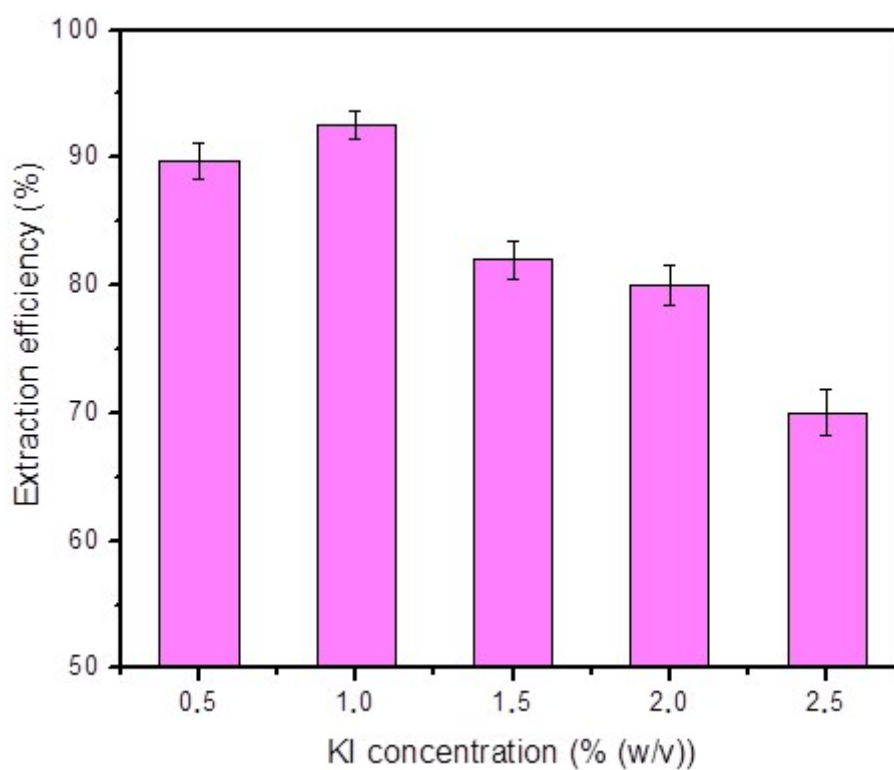

**Fig. S6.** Effect of KI concentration on Sb extraction efficiency of the MIL-DLLME method. Other conditions were as mentioned in Table 1 (95% confidence interval, n = 6).



**Figure S7**

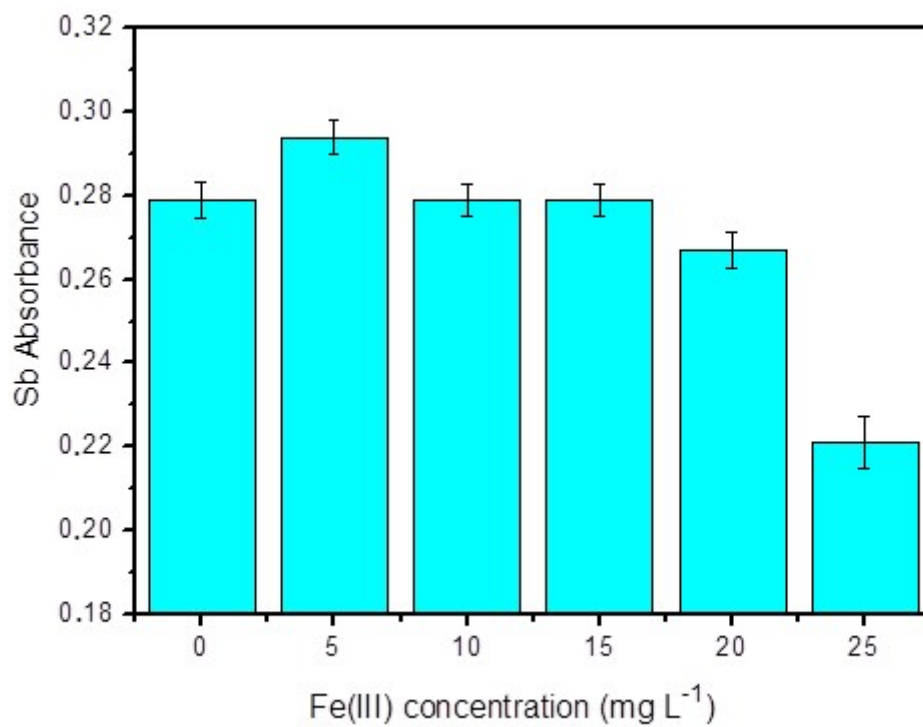

**Fig. S7.** Effect of Fe(III) concentration on Sb signal. A volume of 20  $\mu\text{L}$  of 200  $\mu\text{g L}^{-1}$  Sb aqueous standard solution was injected. ETAAS instrumental conditions were as indicated in Table 1 (95% confidence interval,  $n = 6$ ).
